# Supplementary material for: Epitaxial growth of core–shell zeolite X–A composites
Source: Royal Society of Chemistry journal article supplement (doi:10.1039/c2ce06432d), 2012-01-01
Supplement: c2ce06432d.pdf [file c2ce06432d.pdf]

## Supplementary Information

### Epitaxial growth of core-shell zeolite X-A composites

Zhengyang Wang,<sup>a,b</sup> Wei Wan,<sup>b</sup> Junliang Sun,<sup>b</sup> Wilder Carrillo-Cabrera,<sup>c</sup> Daniel Grüner,<sup>b,c</sup>

Xiaoju Yin,<sup>a</sup> Shilun Qiu,<sup>a</sup> Guangshan Zhu<sup>\*a</sup> and Xiaodong Zou<sup>\*b</sup>

<sup>a</sup> *State Key Laboratory of Inorganic Synthesis and Preparative Chemistry, Jilin University, Changchun 130012, China.*

<sup>b</sup> *Berzelii Center EXSELENT on Porous Materials and Department of Materials and Environmental Chemistry, Stockholm University, SE-106 91 Stockholm, Sweden.*

<sup>c</sup> *Max-Planck-Institut für Chemische Physik fester Stoffe, D-01187 Dresden, Germany.*

Corresponding authors:

Guangshan Zhu, Fax: +86 431 85168331; Tel: +86 431 85168331; E-mail: [zhugs@jlu.edu.cn](mailto:zhugs@jlu.edu.cn)

Xiaodong Zou, Fax: +46 8 152187; Tel: +46 8 162389; E-mail: [xzou@mmk.su.se](mailto:xzou@mmk.su.se)

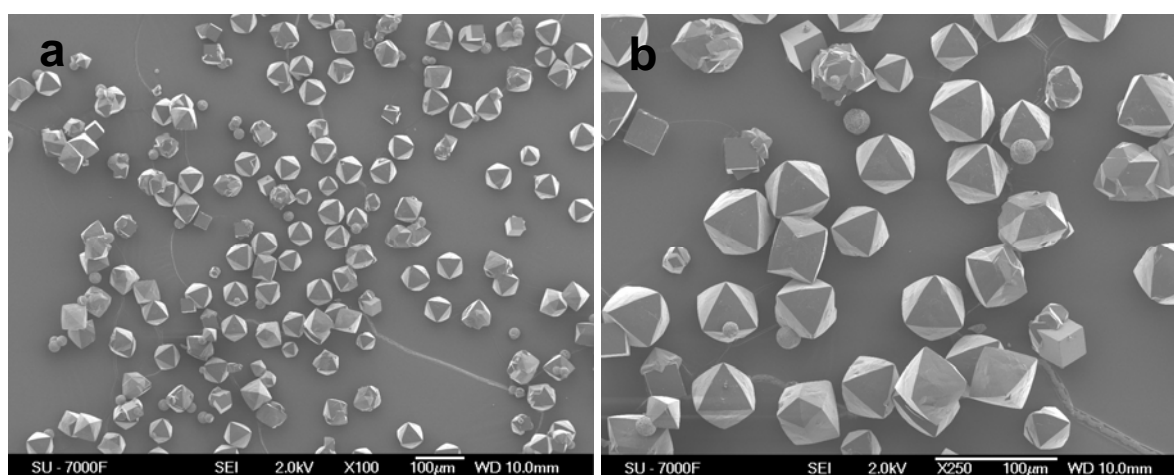

**Fig. S1** SEM images of zeolite X at (a) low magnification and (b) high magnification.

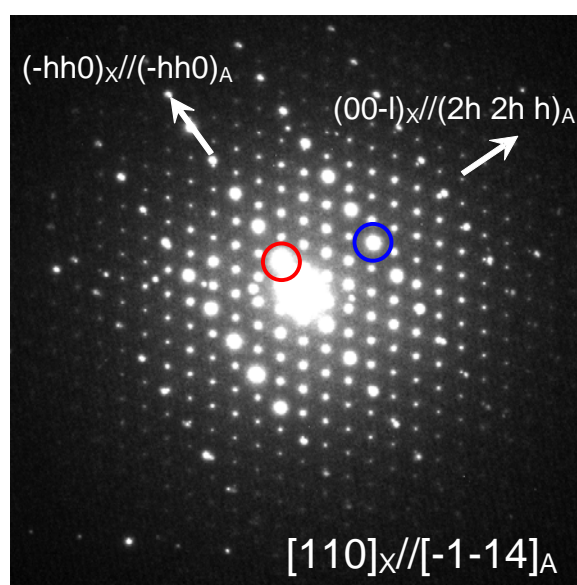

**Fig. S2** Superposition of the  $[110]$  SAED pattern from the zeolite X core crystal (Fig. 6c) and the  $[-1-14]$  SAED pattern from the crystal (g) of zeolite A (Fig. 6g). The two crystals have well-defined orientation relationship. Two directions of X and A are indicated by the arrows. The overlapping reflection  $(-220)_X$  and  $(-220)_A$  is marked by a red circle and the blue circle indicates the overlapping  $(00-6)_X$  and  $(442)_A$  reflections.

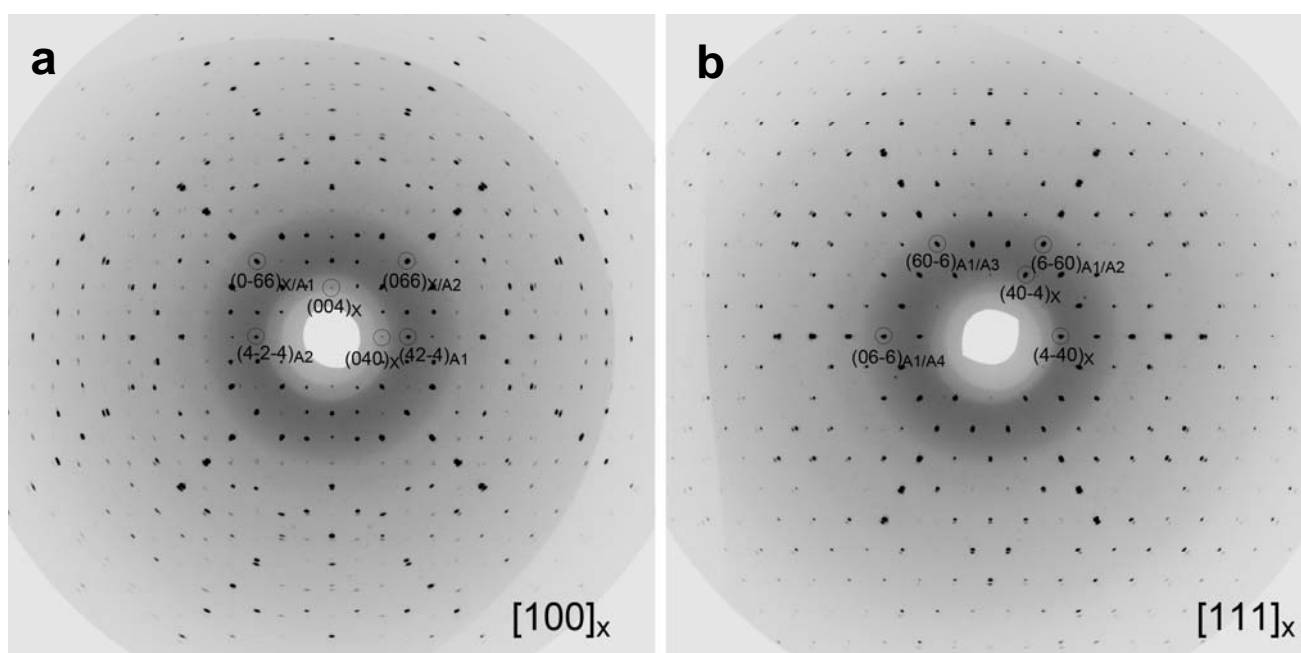

**Fig. S3** Reconstructed reciprocal lattice planes from X-ray diffraction of a single composite crystal. (a) The  $(0\ k\ l)_x$  plane of zeolite X where reflections from two zeolite A lattices (A1 and A2) overlap with those of zeolite X. (b) The  $(h\ k\ -h-k)_x$  plane of zeolite X where reflections from four zeolite A lattices (A1-A4) are indexed.
